# Supplementary material
Source: Research Square preprint supplement (doi:10.21203/rs.3.rs-9746114/v1)
Supplement: Supplementary file 1 [file 1bb9d247c2076a6e0140452c.docx]

**Supplementary table**

| **Appendix table: variance inflation factor (VIF) of variables** | |
| --- | --- |
| eGDR | 2.2 |
| Sex | 1.9 |
| Age (yrs) | 1.2 |
| BMI (kg/m2) | 2.4 |
| Alcohol xonsumption (g/week) | 1.3 |
| Fatty liver | 1.6 |
| ALT (IU/L) | 4.1 |
| AST (IU/L) | 3.3 |
| Exercise habit | 1 |
| GGT (IU/L) | 1.5 |
| HDL-C (mmol/L) | 1.8 |
| TC (mmol/L) | 1.4 |
| TG (mmol/L) | 1.8 |
| Smoking status | 1.4 |
| FPG (mmol/L) | 1.3 |
